# Supplementary material for: Finding your strong points: Exploring the Design and Resilience of Barbed Composite Weapons
Source: Research Square preprint supplement (doi:10.21203/rs.3.rs-5117544/v1), 2024-12-12
Supplement: Supplementary file 1 [file 5f558b0db7e9055d5e7aa281.xlsx]

## Sheet: Table1
Author(s)	year	title	NO EXP	Function	action (if not shot)	propulsion mode	hafting system	haft/point morphology	Haft/point material	grooved haft/point	inset material	inset morphology	Archaeological model	fixation/glue type	sample size	Target	Aim of experiments	Traces	penetration	detachment
Moss and Newcomer	1982	Reconstruction of tool use at pincevent: microwear an experiments	yes	projectiles		bow and arrow	cutting edge	arrow	wood	no	Seine flint	backed bladelets	Magdalenian backed bladelets from Pincevent	pine resin	3 arrows - 13 insets	meat	building a use-wear reference collection to analyse an archaeological lithic collection	basal crushing when hafted in rows, occasional presence of linear meat polish along the exposed edge when hafted singly	NA	Nearly all insets detached
Barton and C. A. Bergman	1982	Hunters at Hengistbury: Some evidence from experimental archaeology	yes	projectiles		bow and arrow	tips and barbs in slots	NA	wood - Port Orford cedar and ordinary Ramin dowel	yes	chalk flint from East Anglia.	backed bladelets	mesolithic microlithic points from Powell site	pine resin mixed with beeswax and animal sinew	NA - 17 flint tools including insets	juvenile fallow deer	experimental reproduction of breakage patterns	several points developed burin-like breaks along their unretouched sides. Some of the points passed right through the target undamaged whilst others developed only transverse breaks	NA	documented for one arrow and three insets
Moss	1983	The Functional analysis of Flint Implements	yes	projectiles		bow and arrow	cutting edge	arrow	wood	no	Seine flint	backed bladelets	Magdalenian backed bladelets from Pincevent	pine resin	4 arows - 14 insets	meat and sandbag	building a use-wear reference collection to analyse an archaeological lithic collection	insets show distinct meat polish, and MLITs along the unhafted edge, on either surface	NA	Nearly all insets detached
Albarello	1986	Sur l'usage des microlithes comme armatures de projectiles / The use of microliths to frame projectile	yes	projectiles		bow and arrow	tips and barbs in slots and without slots	NA	wood	both	NA	asymetrical trapeze - Martinet Trapeze-point - transverse arrowhead	mesolithic microliths	pine resin mixed with beeswax and additives such as charcoal, crushed bone and wood residues	NA - 33 flint tools including insets	hide-meat-bone forming a 15cm deep target	create a reference of use-wear traces related to projectile use	striations and microlinear polish developped in the functional direction	NA	Inset failure observed in 13 lateral composite weapons
Stodiek	2000	Preliminary Results of an Experimental Investigation of Magdalenian Antler Points	yes	projectiles		firing mechanism similar to. a crossbow	two rows of cutting edges	simple bevelled and double bevelled conical points	osseous - antler points	NA	NA	backed bladelet (n=?) Hamburgian type (n=5) and Upper Solutrean type (n=3)	Hamburgian type (n : 5) and Upper Solutrean type (n : 3)	pine resin and beeswax	5 projectiles - 30 insets (?)	fallow deer (gutted)	investigate the suitability and durability of various methods of hafting, secondly to examine patterns of impact damage on projectile points and bones and, thirdly, to document possible differences in the depth of penetration by projectiles.	NA	NA	"Very easily detached upon contact with hard material"
Crombé et al	2001	Wear analysis on early mesolithic microliths from the verrebroek site, east flanders, belgium	yes	projectiles		bow and arrow	tip and barb combination	pine shaft	wood	yes	fine grained flint from the Meuse region (Belgium)	25 crescents, 24 triangles, and 47 obliquely truncated points	Mesolithic microliths from the Verrebroek Site	pine resin	87 arrows (?) - 96 insets	sheep	proving that low fracturation levels can be associated with lateral hafting	All but three specimens were undamaged. Fractures appeared to be more or less perpendicular to the long axis of the arrow shaft, together with the creation of a languette -i.e., a fracture zone running parallel with the flake surface that displayed hinge termination running parallel to the back of the experimental piece. Fracturing always initiated along the unmodified edge. On two specimens the …	NA	"a large number of barbs detached"
Borgia	2008					bow and arrow	double cutting edge		wood - viburnam	NA	NA	bipoints with a retouched back	Gravettian backed bladelets from Paglicci	commercial glue, sinew	70 armatures (approx.) - ? Insets	pile of animal parts - wall - soil	creating a reference collection of impact traces	Absence of macroscopic wear, but the presence of a linear microscopic polish is seen both perpendicularly to the axis of the inset on the proximal and distal extremities and longitudinally on the unretouched edges	NA	NA
Chesnaux	2008	Sauveterrian Microliths: Evidence of the Hunting Weapons of the Last Hunter-Gatherers of the Northern Alps	yes	projectiles		bow and arrow	tip and barbs	NA	wood - cedarwood	yes	Val de Lans and Vaucluse flint	scalene triangles (n=80) and segments (n=80)	Sauveterrian microliths	vegetal resin and beeswax	40 arrows - 160 insets	wild boar	reconstruct a hafting system based on the functional hypotheses for each weapon element type and compare the ballistic functioning of triangles and segments	Near absence of traces on the barbs. Two insets show impact damage on the proximal point, one with a smooth, snap fracture, and the other with a fracture with a hinge termination. Two insets show edge damage. No impact traces such as hafting polish or striations were found on a microscopic level.	0-115 mm	Approximately 66% of inset failure
Yarhosevich et al	2010	Design and performance of microlith implemented projectiles during the Middle and the Late Epipaleolithic of the Levant: experimental and archaeological evidence	yes	projectiles		bow and arrow	Oblique point with oblique barb- Straight point with four oblique barbs-Self-pointed with twisted barbs- Self-pointed with lateral blades	shafts and simple conical osseous points	wood	both	NA	arch-backed bladelets (N =4), Kebara points (N= 9), trapeze/rectangles (N= 7), Helwan lunates (N= 6) and lunates with abrupt retouch (N = 6)	Levantine microliths	mixture of beeswax and resin with the addition of either gypsum powder or ochre powder as a filling.Fiber binding in some cases	40 arrows - 160 insets	goat and skinned sheep thorax encased in cardboard	analyzing performance abilities of the arrows, identifying projectile damage types characteristic of particular hafting modes, detecting factors influencing the frequency of projectile damage and estimating the frequency of projectile damage expected to be found in archaeological samples.	Few traces are found, mostly consisting of transversal bending fractures initiated from the unretouched edge and oriented obliquely and perpendicularly in the mesial part. Several bending tip fractures have been found, both longitudinally and obliquely to the long axis. Only a few oriented lateral scars have been recorded on the unretouched edges.	56-430 mm	Approximately 50% of inset failure
Pétillon et al	2011	Hard core and cutting edge: Experimental manufacture and use of Magdalenian composite projectile tips	yes	projectiles		spearthrower	cutting edges	dowels made of tropical light hardwood (meranti)	osseous - antler points	both	Cher Valley Flint	backed bladelets with inverse retouch	Lower Magdalenian microliths	mixture of beeswax, resin and ochre - birch-bark pitch	24 spears - 58 insets	deer	test the role and efficiency of the lithic inserts	NA	NA	More than 80% of inset failure
Chesnaux	2014					See Chesnaux, 2008
Chesnaux	2014	Réflexion sur le microlithisme en France au cours du Premier Mésolithique Xè-VIIIè millénaire avant J . -C . : approche technologique , expérimentale et fonctionnelle	yes	projectiles		bow and arrow	tip and barbs (see Chesnaux 2008)	NA	wood - pinewood	yes	Val de Lans and Vaucluse flint	scalene triangles and segments	Sauveterrian microliths	vegetal resin and beeswax	20 arrows - 80 insets	wild boar	reconstruct a hafting system based on the functional hypotheses for each weapon element type and compare the ballistic functioning of triangles and segments	Few traces are found, and burination are found more often on lateral insets than on tips	NA	partial detachment in each shot
Chesnaux	2014	Réflexion sur le microlithisme en France au cours du Premier Mésolithique Xè-VIIIè millénaire avant J . -C . : approche technologique , expérimentale et fonctionnelle	yes	projectiles		bow and arrow	tip and barbs, sometimes barbs only	NA	wood - pinewood	yes	Val de Lans and Vaucluse flint	scalene and isocele triangles, segments, sauveterrian points, truncated points, retouched base points	Sauveterrian and Beuronian microliths	Araldite - pine resin and beeswax with ochre and commercial resin addition	55 arrows - 109 insets	sheep (shaven)	evaluate the resilience of different glues in a projectile hafting system and evaluate the influence of a thinner-skinned target on barb failure upon impact. Producing wear.	25% of the insets show impact damage, most often lateral scars, sometimes sliced scarring. Seven insets show a burin-like fracture and two are transversely fractured.	NA	More than 50% of inset failure
Rots	2016	Projectiles and hafting technology	yes	projectiles	/	bow and arrow	tip and barbs combination	arrow	wood	no	flint	geometric microlith	NA	resin	100 arrows - 104 insets (+100 tips. Four arrows were eqipped with 2 insets	sheep	examine whether a reliable distinction between tips and barbs was possible based on a microscopic analysis. In addition, the efficiency of using bindings instead of resin for hafting the pieces was tested.	Overall, barbs showed less diagnostic damage types than tips. Tip fractures occur on 57% of the barbs, but were rarely diagnostic. Spin-offs and burination occured on barbs. Lateral scarring was frequent on both tips and barbs, but sliced scarring – typical of the cutting motion upon impact – were clearly more frequent on barbs. MLITs are present on barbs (less than on tips) associated with later…	0-250 mm	50% of inset failure
Gaillard et al.	2016	Assessing Hafting Adhesive Efficiency in the Experimental Shooting of Projectile Points: A new Device for Instrumented and Ballistic Experiments	yes	projectiles		bow and arrow used with a mechanical arm	multiple barbs in rows or random positions around the shaft	NA	wood - pinewood	yes	flint	triangles, segments and points	Sauveterrian microliths	different blends of rosin and beeswax	NA	balistic gelatin block and boar shoulder	provide better control of shooting experiments performed with replicas of prehistoric projectiles	NA	250-300 mm	NA
Tomasso et al.	2018	Gravettian weaponry: 23,500-year-old evidence of a composite barbed point from Les Prés de Laure (France)	yes	projectiles		spearthrower + bow and arrow	multiple barbs in rows or random positions around the shaft	gravettian conical point	osseous	no	flint	backed bladelet with a curved back and appointed extremeties	Gravettian backed bladelets from Les Prés de Laure site	resin mixture and protein glue	12 projectiles ; 83 recovered insets	artificial - balistic gel/horse bones/fresh hide	produce reference material that further supports typical damage patterns for barbs	The barbs of the “design (a)” (in this paper, see Fig.2, first composite point of Tomasso et al, 2018) point have very specific impact traces. Scars along the cutting edge occur frequently. The distal point (i.e. the truncation) shows damage related with an axial force, while the proximal part often shows scars related to a counter-pressure. A single fracture identified in the proximal part of on…	148-165mm	partial detachment in each shot
de La Pena et al	2018	A techno-functional perspective on quartz micro-notches in Sibudu's Howiesons Poort indicates the use of barbs in hunting technology	yes	projectiles		bow and arrow	lateral hafting A. by sinew bindings set in a notch B. Sinew and resin C. resin	pine shaft	wood	both (grooved=2)	crystal quartz (n=18) and vein quartz (27)	retouched (n=17) and unretouched (n=28)notched microliths	quartz micro-notches from Sibudhu Howieson's Poort	70% natural spruce resin and 30% beeswax + sinew bindings	13 arrows - 45 insets	artificial - balistic gel/horse bones/fresh hide	evaluate different hypotheses for notch formation	Elongated bending-initiated fractures starting on one edge and terminating on the opposite edge (Burinations), and spin-offs, defined here as cone- initiated scars starting from an earlier fracture surface and termi- nating on a ventral or dorsal surface or a lateral edge are found. Distinct micro-notches were observed on four pieces, in two cases in association with a fracture. They consist of a…		more than 50% of inset failure
Gauvrit Roux et al	2020	Reconstructing Magdalenian hunting equipment through experimentation and functional analysis of backed bladelets	yes	projectiles		spearthrower	cutting edges and rows of barbs	single-bevelled points	osseous -reindeer antler	yes	Bergeracois flint, Upper Turonian flint, Campanian flint and Kimmeridgian flint from Switzerland.	Early Middle Magdalenian backed bladelets, come with convergent retouch and appointed, some with parallel retouch	Early Middle Magdalenian backed bladelets	hafting adhesive composed of colophony (30–40%), beeswax (60–70%) and Villecroze bauxite powder (5–10%)	24 spears - 84 insets	sheep	investigate microliths function and address the question of projectile design, and developing a methodological frame for the functional analysis of damages on the lithic projectile inserts with a specific focus on lateral scars	Impact damages affect 38% of the bladelets. Most frequent damages are scars (37% of the microliths). Fractures (6%) and MLIT (2%) are scarcer.The head bladelet is as often scarred as tail bladelets. Four categories of scars can be found. The first one gathers large isolated scars, oblique to the edge, they can be quite large and invasive and are grazing. They have varied morphologies and terminat…	15-320mm	minimal detachment
Pargeter et al	2022	Stone tool backing and adhesion in hunting weaponry: First results of an experimental program	yes	projectiles		Spot Hogg Hooter-Shooter	A)Tip and laterally hafted backed tools, B) Tip and laterally hafted non-backed tools	poplar dowels	wood	NA	Texas Georgetown chert	backed segments (n=75) and standardized unretouched bladelets (n=75)	NA	Ferr-L-Tite and Sterno™ gel	50 projectiles - 150 insets	oak board	determine the influence of a back retouch and hafting position on adherence with a haft, and the influence on haft splitting.	NA	85-260mm	Approximately 80% of inset failure

## Sheet: Table2
Wooden points							18
Grooved	RBO1	2024-04-04	Fish Glue	2024-04-03	Bone Glue	2024-04-04	11
Ungrooved	RBO1	2024-04-04	Fish Glue	2024-04-03	Bone Glue	0/4	7
Antler points							21
Grooved	RB	2024-04-04	Fish Glue	2024-04-04	Bone Glue	2024-04-04	12
Ungrooved	RB	2024-04-04	Fish Glue	2024-04-04	Bone Glue	2024-04-01	9
TOTAL							39

## Sheet: Table3
Tool ID	Shot ID	Point Material	Groove	Glue Type	Contact Material	Hafting State After Shot	Penetration (cm)
114/213	114/213/01	antler	yes	fish glue	gel; skin	dehafted	18
114/214	114/214/01	antler	yes	fish glue	wall/other	point breakage	0
114/215	114/215/01	antler	yes	fish glue	gel; skin	point breakage	12
114/216	114/216/01	antler	no	fish glue	gel; skin	unchanged	13
114/216	114/216/02	antler	no	fish glue	wood	dehafted	0
114/217	114/217/01	antler	yes	fish glue	gel; skin	dehafted	12
114/218	114/218/01	antler	yes	bone glue	gel; skin	dehafted	1
114/222	114/222/01	antler	yes	bone glue	skin	dehafted	0
114/223	114/223/01	antler	yes	bone glue	gel; skin	dehafted	1
114/225	114/225/01	antler	yes	RB	gel; skin	unchanged	5
114/225	114/225/02	antler	yes	RB	skin	unchanged	6
114/225	114/225/03	antler	yes	RB	skin	unchanged	0
114/226	114/226/01	antler	yes	bone glue	wall	point breakage	0
114/228	114/228/01	antler	yes	RB	gel; skin	unchanged	17
114/228	114/228/02	antler	yes	RB	gel; skin	dehafted	13
114/230	114/230/01	antler	yes	RB	gel; skin	unchanged	14
114/230	114/230/02	antler	yes	RB	gel; skin	dehafted; point breakage	12
114/231	114/231/01	antler	yes	RB	skin	dehafted	0
114/233	114/233/01	wood	yes	RBO1	gel; skin	unchanged	?
114/233	114/233/02	wood	yes	RBO1	gel; skin	unchanged	11
114/233	114/233/03	wood	yes	RBO1	gel; skin	unchanged	?
114/233	114/233/04	wood	yes	RBO1	wall	point breakage	0
114/235	114/235/01	wood	yes	bone glue	gel; skin	unchanged	19
114/235	114/235/02	wood	yes	bone glue	skin	unchanged	?
114/235	114/235/03	wood	yes	bone glue	gel; skin	unchanged	19
114/235	114/235/04	wood	yes	bone glue	gel; skin	unchanged	19
114/235	114/235/05	wood	yes	bone glue	bone; gel; skin	unchanged	20
114/235	114/235/06	wood	yes	bone glue	gel; skin	unchanged	19
114/235	114/235/07	wood	yes	bone glue	gel; skin	unchanged	19
114/235	114/235/08	wood	yes	bone glue	gel; skin	moved but still usable	19
114/235	114/235/09	wood	yes	bone glue	gel; skin	moved but still usable	?
114/235	114/235/10	wood	yes	bone glue	gel; skin	moved but still usable; point breakage	?
114/236	114/236/01	wood	yes	bone glue	skin	dehafted	0
114/237	114/237/01	wood	yes	bone glue	gel; skin	dehafted	11
114/238	114/238/01	wood	yes	RBO1	gel; skin	dehafted	5
114/240	114/240/01	wood	yes	bone glue	other	point breakage	0
114/241	114/241/01	wood	yes	RBO1	bone; gel; skin	unchanged	17
114/241	114/241/02	wood	yes	RBO1	gel; skin	unchanged	18
114/241	114/241/03	wood	yes	RBO1	bone; gel; skin	moved but still usable	18
114/241	114/241/04	wood	yes	RBO1	gel; skin	unchanged	?
114/241	114/241/05	wood	yes	RBO1	gel; skin	unchanged	?
114/241	114/241/06	wood	yes	RBO1	bone; gel; skin	dehafted	0
114/244	114/244/01	wood	yes	RBO1	gel; skin	unchanged	13
114/244	114/244/02	wood	yes	RBO1	bone; gel; skin	unchanged	?
114/244	114/244/03	wood	yes	RBO1	bone; gel; skin	point breakage	0
114/245	114/245/01	wood	no	RBO1	bone; gel; skin	unchanged	17
114/246	114/246/01	wood	yes	fish glue	gel; skin	unchanged	?
114/246	114/246/02	wood	yes	fish glue	gel; skin	dehafted	18
114/247	114/247/01	wood	no	fish glue	wall	point breakage	0
114/248	114/248/01	wood	no	RBO1	gel; skin	unchanged	?
114/248	114/248/02	wood	no	RBO1	gel; skin	dehafted	0
114/249	114/249/01	wood	no	RBO1	gel; skin	unchanged	11
114/249	114/249/02	wood	no	RBO1	gel; skin	dehafted	1
114/251	114/251/01	wood	yes	fish glue	gel; skin	dehafted	10
114/253	114/253/01	wood	no	RBO1	skin	unchanged	5
114/253	114/253/02	wood	no	RBO1	skin	dehafted	0
114/255	114/255/01	wood	no	fish glue	gel; skin	dehafted	14
114/256	114/256/01	antler	no	fish glue	other	point breakage	0
114/261	114/261/01	wood	no	fish glue	skin	dehafted	0
114/269	114/269/01	antler	no	bone glue	gel; skin	dehafted	12
114/274	114/274/01	antler	no	RB	gel; skin	dehafted	9
114/275	114/275/01	wood	yes	fish glue	gel; skin	dehafted; point breakage	1
114/277	114/277/01	antler	no	RB	gel; skin	unchanged	17
114/277	114/277/02	antler	no	RB	gel; skin	unchanged	12
114/277	114/277/03	antler	no	RB	gel; skin	unchanged	13
114/277	114/277/04	antler	no	RB	bone; gel; skin	dehafted	13
114/280	114/280/01	antler	no	RB	wall	point breakage	0
114/281	114/281/01	antler	no	RB	skin	dehafted	0
114/282	114/282/01	antler	no	fish glue	skin	dehafted	8
114/283	114/283/01	antler	no	fish glue	skin	dehafted	9

## Sheet: Table4
	UNGROOVED				GROOVED
	Wood points		Antler points		Wood points		Antler points
Resin mixtures	4	7	3	6	4	13	2	8
Fish glue	2	2	3	3	3	4	3	3
Bone glue	0	0	1	1	3	12	3	3
	Nr of projectiles	Nr of successful shots	NP	NSS	NP	NSS	NP	NSS

## Sheet: Feuil5
Fracture	Initation	Locus	Location of initiation	General Direction	Termination	Location of termination	composition	Fracture Type	Category
EXP114/213/01	Cone	Distal	Left Lateral Edge	diagonal towards the base	Feather	Dorsal surface	multiple	Scar	Lateral scar
EXP114/213/02	Bending	Distal	Left Lateral Edge	diagonal towards the base	Feather	Left lateral edge	multiple	Scar	Lateral scar
EXP114/215/01	Bending	Distal	Apex	apex to base	Snap	Right Lateral Edge;Ventral surface	single	Break	Bending break
EXP114/215/02	Cone	Distal	Ealier Fracture surface	apex to base	Step	Dorsal surface	single	Scar	Secondary damage
EXP114/215/03	Bending	Mesial	Right Lateral Edge	diagonal towards the base	Feather	Dorsal surface	multiple	Scar	Lateral scar
EXP114/215/04	Bending	Mesial	Right Lateral Edge	diagonal towards the base	Feather	Dorsal surface	single	Scar	Lateral scar
EXP114/215/05	Cone	Distal	Ealier Fracture surface	perpendicular to the long axis	Feather	Dorsal surface	multiple	Scar	Secondary damage
EXP114/215/06	Bending	Distal	Ealier Fracture surface	apex to base	Step to step	Dorsal surface	single	Scar	Secondary damage
EXP114/223/01	Bending	Distal	Apex	apex to base	Step	Ventral surface	single	Break	Bending break
EXP114/230/01	Bending	Distal	Apex	apex to base	Step	Ventral surface	single	Break	Bending break
EXP114/230/02	Bending	Distal	Right Lateral Edge	diagonal towards the base	Feather	Dorsal surface	multiple	Scar	Lateral scar
EXP114/235/01	Bending	Distal	Apex;Ventral surface	apex to base	Snap	Dorsal surface;Left lateral edge	single	Scar	scar
EXP114/236/01	Cone	Mesial	Right Lateral Edge	perpendicular to the long axis	Feather	Dorsal surface;Right Lateral Edge	multiple	Scar	Lateral scar
EXP114/237/01	Cone	Proximal	Right Lateral Edge	perpendicular to the long axis	Feather	Dorsal surface	single	Scar	Lateral scar
EXP114/237/02	Cone	Proximal	Right Lateral Edge	perpendicular to the long axis	Feather	Dorsal surface	single	Scar	Lateral scar
EXP114/238/01	Bending	Mesial	Right Lateral Edge	diagonal towards the base	Feather	Ventral surface	single	Scar	Lateral scar
EXP114/238/02	Bending	Mesial	Right Lateral Edge	diagonal towards the base	Feather	Ventral surface	single	Scar	Lateral scar
EXP114/238/03	Bending	Mesial	Right Lateral Edge	diagonal towards the base	Feather	Ventral surface	single	Scar	Lateral scar
EXP114/241/01	Bending	Distal	Apex	apex to base	Step to step	Left lateral edge	single	Break	Bending break
EXP114/241/02	Bending	Distal	Right Lateral Edge	diagonal towards the apex	Step	Dorsal surface	single	Scar	Lateral scar
EXP114/241/03	Bending	Distal	Right Lateral Edge	diagonal towards the apex	Step	Dorsal surface	single	Scar	Lateral scar
EXP114/241/04	Bending	Mesial	Right Lateral Edge	diagonal towards the apex	Feather	Ventral surface	single	Scar	Lateral scar
EXP114/244/01	Bending	Distal	Apex	apex to base	Step	Left lateral edge	single	Break	Bending break
EXP114/245/01	Bending	Mesial	Right Lateral Edge	diagonal towards the base	Hinge to feather	Right Lateral Edge;Ventral surface	single	Scar	Lateral scar
EXP114/245/02	Bending	Distal	Apex	apex to base	Step	Ventral surface	single	Break	Bending break
EXP114/245/03	Bending	Mesial	Right Lateral Edge	diagonal towards the base	Step	Ventral surface	single	Scar	Lateral scar
EXP114/245/04	Bending	Mesial	Right Lateral Edge	diagonal towards the base	Step	Ventral surface	single	Scar	Lateral scar
EXP114/245/05	Bending	Proximal	Right Lateral Edge	diagonal towards the base	Step	Ventral surface	single	Scar	Lateral scar
EXP114/245/06	Cone	Mesial	Ealier Fracture surface	diagonal towards the base	Feather	Ventral surface	multiple	Scar	Secondary damage
EXP114/249/01	Bending	Distal	Right Lateral Edge	diagonal towards the base	Step	Ventral surface	single	Scar	Lateral scar
EXP114/253/01	Bending	Distal	Apex	apex to base	Hinge to step	Ventral surface	single	Break	Bending break
EXP114/274/01	Cone	Mesial	Right Lateral Edge	perpendicular to the long axis	Feather	Ventral surface	single	Scar	Lateral scar
EXP114/275/01	Bending	Proximal	Dorsal surface	base to apex	Step	Ventral surface	single	Break	Bending break
EXP114/275/02	Bending	Proximal	Ealier Fracture surface	base to apex	Step	Right Lateral Edge	single	Scar	Secondary damage
EXP114/277/01	Bending	Distal	Apex	apex to base	Feather	Ventral surface	single	Break	Bending break
